# Supplementary material for: SVR Chemometrics to Quantify β-Lactoglobulin and α-Lactalbumin in Milk Using MIR
Source: MDPI journal article supplement (doi:10.3390/foods13010166), 2024-01-03
Supplement: s1 [file s1]

Supplementary materials.

## Outlier detection

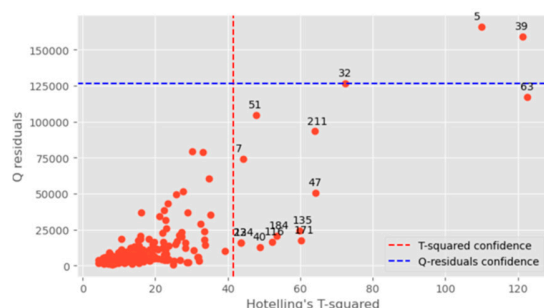

**Figure S1.** Outlier detection using Hotelling T2 and Q-residuals. The blue and red dashed lines are the 99% confidence interval for Q-residuals and Hotelling T2 respectively. The red circles represent sample replicates. Red circles with text are outliers with the text being the index of the replicate in the dataset. Samples that fall outside the either Q-residuals or Hotelling T2 confidence intervals are regarded as outliers.

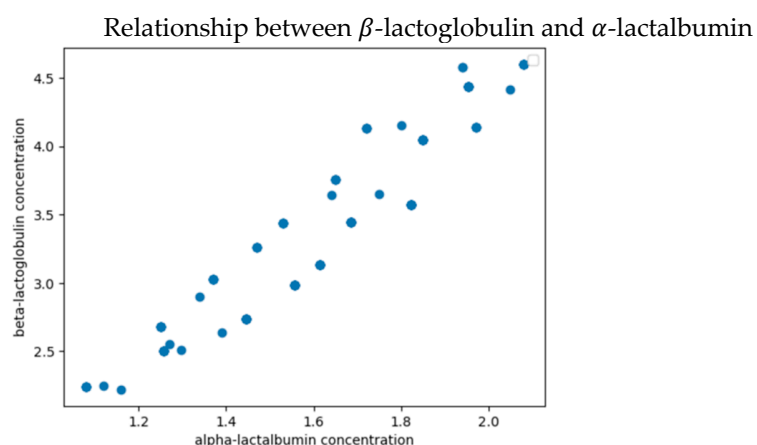

**Figure S2.** Relationship between  $\beta$ -lactoglobulin and  $\alpha$ -lactalbumin

The plot in **Figure S2** shows a linear trend between  $\beta$ -lactoglobulin and  $\alpha$ -lactalbumin concentration values.

**Table S1.** Preprocessing techniques applied and their parameter configurations.

| Technique Parameter(s) |                                 |
|------------------------|---------------------------------|
| MC                     | None                            |
| SNV                    | None                            |
| MSC                    | None                            |
|                        | Filter_window= 77, 99, 115, 151 |
| SavGol                 | Poly_order = 1,2,3              |
|                        | Deriv_order = 0,1               |
| EMSC                   | None                            |
| LSNV                   | None                            |
| RNV                    | IQR= [90, 10], [75,25]          |
| Normalize None         |                                 |

MC-mean centering; SNV-standard normal variate; MSC-multiplicative scatter correction; SavGol-Savitzky Golay; EMSC-extended multiplicative scatter correction; LSNV-localize standard normal variate; RNV- Robust normal variate; IQR-interquartile range; n\_comps-number of PLS components.

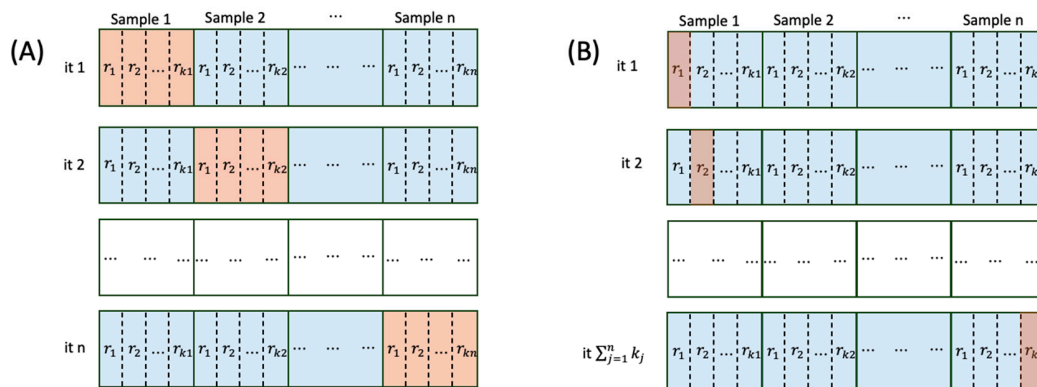

**Figure S3.** Schematic diagram of the LOOCV workflow for training and evaluating the performance of the chemometric models. (A) LOSOCV (B) LOROCV. The replicates are separated using the dashed lines and are represented as  $r_i$  where  $i$  is the index of the replicate within the sample. Regions in orange color are the test samples while those in blue color are the training samples. The  $i$ th training iteration is represented as "it  $i$ ".

**Table S2.** GA parameters and their corresponding values.

| Parameter                    | Value                    |
|------------------------------|--------------------------|
| Fitness Function             | R2 value of PLS model    |
| Population Size              | 30                       |
| Selection Method             | roulette wheel selection |
| Crossover Method             | One-point crossover      |
| Crossover Probability        | 50%                      |
| Mutation Method              | bits-flip mutation       |
| Mutation Probability         | 1%                       |
| Termination Criteria         | 100 runs                 |
| Maximum Number of Components | 15                       |

**Table S2** gives the parameter used for the GA analysis. The fitness function assesses each chromosome's quality by maximizing its R2. The population size equals the user-defined number of chromosomes which is 30 in our case. Selection employs a roulette wheel mechanism, favoring chromosomes with high fitness values. Crossover probability is set at 50%, and mutation probability at 1%. The crossover determines the likelihood of two selected chromosomes undergoing crossover to create new offspring while the mutation determines the likelihood of individual bits (data points) within a chromosome undergoing mutation. The GA conducts 100 runs. PLS component selection occurs during the GA, using 15 components as the maximum n\_components.

**Table S3.** Equidistant intervals comprising the starting datapoint, ending datapoint, and number of wavenumber data points in each interval.

| Interval | Start wav. | End wav. | Number of data points |
|----------|------------|----------|-----------------------|
| 1        | 525.025    | 698.587  | 721                   |
| 2        | 698.828    | 872.39   | 721                   |
| 3        | 872.631    | 1046.19  | 721                   |
| 4        | 1046.43    | 1220     | 721                   |
| 5        | 1220.24    | 1393.8   | 721                   |
| 6        | 1394.04    | 1567.6   | 721                   |
| 7        | 1567.84    | 1741.4   | 721                   |
| 8        | 1741.65    | 1915.21  | 721                   |
| 9        | 1915.45    | 2089.01  | 721                   |
| 10       | 2089.25    | 2262.81  | 721                   |

|    |         |         |     |
|----|---------|---------|-----|
| 11 | 2263.06 | 2436.62 | 721 |
| 12 | 2436.86 | 2610.42 | 721 |
| 13 | 2610.66 | 2784.22 | 721 |
| 14 | 2784.47 | 2958.03 | 721 |
| 15 | 2958.27 | 3131.83 | 721 |
| 16 | 3132.07 | 3305.63 | 721 |
| 17 | 3305.87 | 3479.2  | 720 |
| 18 | 3479.44 | 3652.76 | 720 |
| 19 | 3653    | 3826.32 | 720 |
| 20 | 3826.56 | 3999.88 | 720 |

**Table S3** gives the wavenumber data points corresponding to each interval. With 14,416 data points, each interval initially contains approximately 720.8 data points, rounded up to 721, until we reach interval 17, where the number becomes evenly divisible by 720.

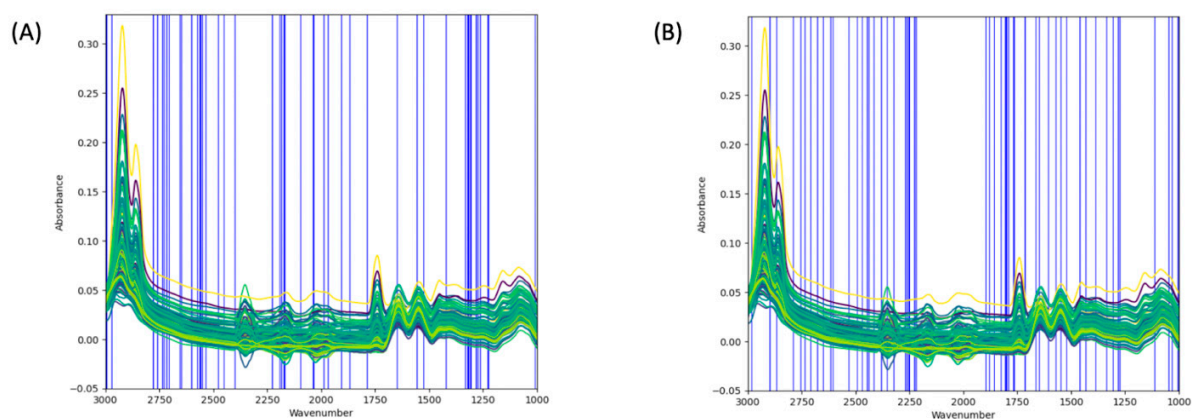

**Figure S4.** Selected wavenumbers data points for (A)  $\beta$ -LG and (B) -LA using simulated annealing. The areas in white background are the excluded wavenumbers and those in blue are the selected wavenumbers.

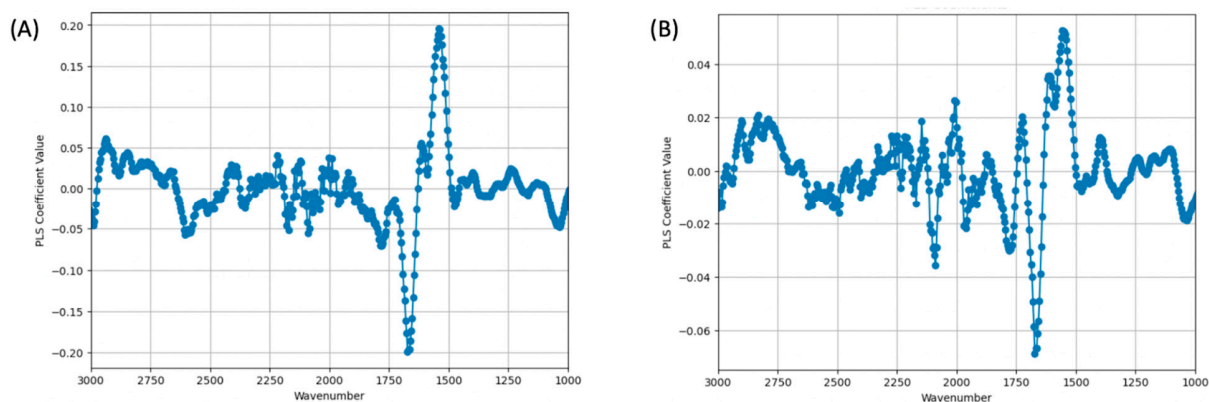

**Figure S5.** The magnitude and direction of wavenumbers selection for (A)  $\beta$ -LG and (B) -LA using PLS coefficient scores. Selected wavenumbers for (1) $\beta$ -LG: 1502-1580, 1606-1618, 2914-2952 (2)  $\alpha$ -LA:1518-1626, 1726, 2004-2015, 2790-2837  $\text{cm}^{-1}$ .

The coefficient values of the wavenumbers data points are given in **Figure S5**. The data points with high coefficients, regardless of their directions (positive or negative) are the best performing data points.

**Table S4.** Interval discarded across different iterations using BiPLS and the model's performance after discarding the interval.

| Iteration | Interval Discarded | RMSE   |
|-----------|--------------------|--------|
| 1         | 20                 | 0.0915 |
| 2         | 16                 | 0.0887 |
| 3         | 9                  | 0.0871 |
| 4         | 11                 | 0.086  |
| 5         | 7                  | 0.0852 |
| 6         | 4                  | 0.0848 |
| 7         | 3                  | 0.0844 |
| 8         | 5                  | 0.0841 |
| 9         | 2                  | 0.0839 |
| 10        | 13                 | 0.0839 |
| 11        | 15                 | 0.0859 |
| 12        | 18                 | 0.0863 |
| 13        | 8                  | 0.0875 |
| 14        | 10                 | 0.0895 |
| 15        | 12                 | 0.092  |

|    |    |        |
|----|----|--------|
| 16 | 19 | 0.0936 |
| 17 | 1  | 0.0942 |
| 18 | 17 | 0.0949 |
| 19 | 14 | 0.0961 |
| 20 | 6  | 0.0978 |

**Table S4** gives the intervals discarded by BiPLS in each iteration along with their corresponding RMSE. The RMSE consistently decreased until iteration 10, after which it started to increase. This indicates that discarding intervals after iteration 9 did not improve RMSE further. Therefore, we selected the optimal intervals (13, 15, 18, 8, 10, 12, 19, 1, 17, 14, 6) corresponding to iterations 10 to 20. The wavenumbers corresponding to each interval are the same as those given in **Table S3**.

**Table S5.** Intervals selected as best performing intervals using SiPLS.

| PLS comp. | Selected Intervals | RMSE   |
|-----------|--------------------|--------|
| 10        | [1, 2, 6, 7]       | 0.0915 |
| 9         | [1, 5, 6, 7]       | 0.0887 |
| 9         | [1, 4, 6, 7]       | 0.0871 |
| 8         | [1, 6, 7, 8]       | 0.086  |
| 9         | [1, 6, 7, 13]      | 0.0852 |
| 8         | [1, 3, 6, 7]       | 0.0848 |
| 10        | [2, 4, 6, 7]       | 0.0844 |
| 9         | [3, 4, 6, 7]       | 0.0841 |
| 10        | [2, 3, 6, 7]       | 0.0839 |
| 10        | [1, 6, 7, 11]      | 0.0839 |

The SiPLS results in **Table S5** display selected intervals and their corresponding RMSE values. SiPLS, an extension of iPLS, combines multiple intervals to build PLS models, and it becomes more computationally expensive as the number of interval combinations increases. The model's iterations are calculated as  $nCr$ , with higher  $n$  and  $r$  values leading to more iterations. In this study, we used 20 intervals for  $n$  and 4 interval combinations for  $r$ , resulting in the best intervals: [2, 3, 6, 7] and [1, 6, 7, 11], both with an RMSE of 0.0839. All selected intervals in Table S5 include intervals 6 and 7, corresponding to wavenumbers in the amide II and I regions.

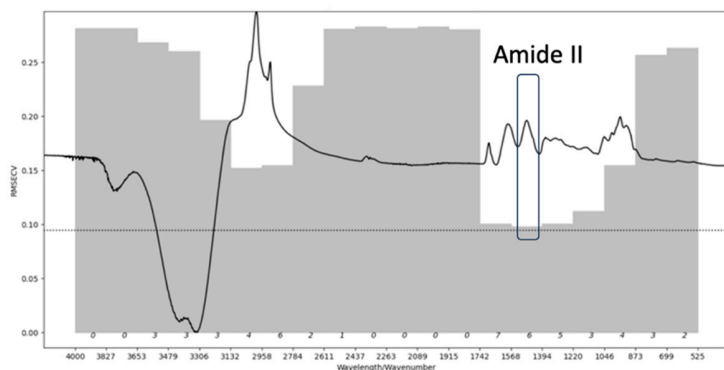

**Figure S6.** Optimal wavenumber selection using iPLS. The bars in gray indicate the RMSECV for each interval.

From **Figure S6**, we tested different numbers of equidistant intervals including 20, 25, and 30. However, 20 intervals were selected because it gave a clearer selection and evaluation of the different peaks. iPLS identified the Amide II region as the region with the least RMSECV. It could be observed that wavenumbers outside the range 873–3000  $\text{cm}^{-1}$  appeared to be insignificant due to the high RMSECV values.

#### GA selection frequency results

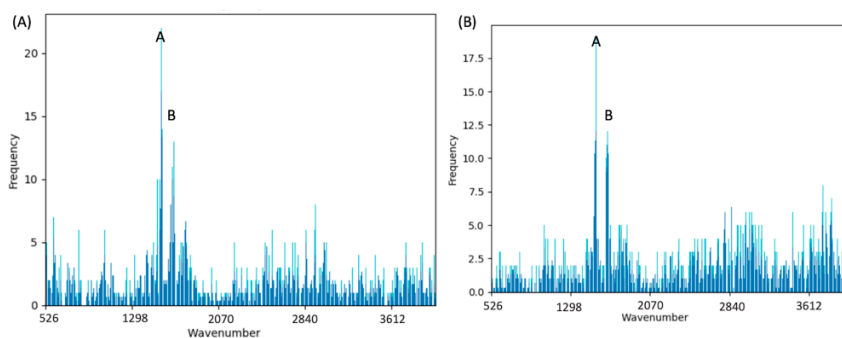

**Figure S7.** Wavenumber frequency selection for (A)  $\beta$ -LG and (B)  $\alpha$ -LA. A- Amide II region, B- Amide I region

**Figure S7** shows that wavenumber datapoints in the amide I and II regions are the most frequently selected by the GA.
